# Supplementary material for: δ-ALA-D activity is a reliable marker for oxidative stress in bone marrow transplant patients
Source: BMC Cancer. 2009 May 8;9:138. doi: 10.1186/1471-2407-9-138 (PMC2694815; doi:10.1186/1471-2407-9-138)
Supplement: Additional file 1 — Panel 1. correlation between biochemical estimations for all groups. A: estimations before CR; B: estimations during CR; C: estimations on day 10 after BMT; D: estimations on day 20 after BMT. CR: conditioning regimen; BMT: bone marrow transplantation; TBARS: thiobarbituric acid-reactive substances; VIT C: vitamin C; CAT: catalase; SOD: superoxide dismutase; P-SH: protein thiol groups; NP-SH: non protein thiol groups; δ-ALA-D: δ-aminolevulinate dehydratase; n.s.: no significant. *Significantly different. [file 1471-2407-9-138-S1.doc]

A

| Estimations before CR | VIT C | CAT | SOD | P-SH | NP-SH | -ALA-D |
| --- | --- | --- | --- | --- | --- | --- |
| TBARS | 0.027  (n.s.) | 0.074 (n.s.) | 0.015  (n.s.) | 0.447 (p=0.005) | 0.057  (n.s.) | 0.052  (n.s.) |
| VIT C | _ | 0.143  (n.s.) | 0.152  (n.s.) | 0.265  (n.s.) | 0.344  (n.s.) | 0.204  (n.s.) |
| CAT | _ | _ | 0.158  (n.s.) | 0.256  (n.s.) | 0.122  (n.s.) | 0.324  (n.s.) |
| SOD | _ | _ | _ | 0.031  (n.s.) | 0.151  (n.s.) | 0.357  (p=0.027) |
| P-SH | _ | _ | _ | _ | 0.069  (n.s.) | 0.102  (n.s.) |
| NP-SH | _ | _ | _ | _ | _ | 0.022  (n.s.) |

B

| Estimations CR | VIT C | CAT | SOD | P-SH | NP-SH | -ALA-D |
| --- | --- | --- | --- | --- | --- | --- |
| TBARS | 0.097  (n.s.) | 0.272  (p=0.018) | 0.202  (n.s.) | 0.327  (p=0.004) | 0.121  (n.s.) | 0.390  (p=0.000) |
| VIT C | _ | 0.062  (n.s.) | 0.028  (n.s.) | 0.332  (p=0.003) | 0.110  (n.s.) | 0.360  (p=0.001) |
| CAT | _ | _ | 0.254  (p=0.033) | 0.015  (n.s.) | 0.126  (n.s.) | 0.278  (p=0.016) |
| SOD | _ | _ | _ | 0.075  (n.s.) | 0.076  (n.s.) | 0.305   (p=0.010) |
| P-SH | _ | _ | _ | _ | 0.012  (n.s.) | 0.616  (p=0.000) |
| NP-SH | _ | _ | _ | _ | _ | 0.000  (n.s.) |

C

| Estimations day 10 after BMT | VIT C | CAT | SOD | P-SH | NP-SH | -ALA-D |
| --- | --- | --- | --- | --- | --- | --- |
| TBARS | 0.543  (p=0.000) | 0.094  (n.s.) | 0.389  (p=0.001) | 0.536  (p=0.000) | 0.220  (n.s.) | 0.590  (p=0.000) |
| VIT C | _ | 0.067  (n.s.) | 0.375  (p=0.003) | 0.601  (p=0.000) | 0.021  (n.s.) | 0.610   (p=0.000) |
| CAT | _ | _ | 0.376  (p=0.001) | 0.001  (n.s.) | 0.019  (n.s.) | 0.121  (n.s.) |
| SOD | _ | _ | _ | 0.252  (p=0.039) | 0.130  (n.s.) | 0.375   (p=0.001) |
| P-SH | _ | _ | _ | _ | 0.118  (n.s.) | 0.624  (p=0.000) |
| NP-SH | _ | _ | _ | _ | _ | 0.005  (n.s.) |

D

| Estimations day 20 after BMT | VIT C | CAT | SOD | P-SH | NP-SH | -ALA-D |
| --- | --- | --- | --- | --- | --- | --- |
| TBARS | 0.567  (p=0.000) | 0.156  (n.s.) | 0.252  (n.s.) | 0.296  (p=0.014) | 0.048  (n.s.) | 0.482   (p=0.000) |
| VIT C | _ | 0.104  (n.s.) | 0.057  (n.s.) | 0.386   (p=0.002) | 0.010  (n.s.) | 0.565   (p=0.000) |
| CAT | _ | _ | 0.295   (p=0.020) | 0.000  (n.s.) | 0.113  (n.s.) | 0.170  (n.s.) |
| SOD | _ | _ | _ | 0.077  (n.s.) | 0.026  (n.s.) | 0.174  (n.s.) |
| P-SH | _ | _ | _ | _ | 0.109  (n.s.) | 0.644  (p=0.000) |
| NP-SH | _ | _ | _ | _ | _ | 0.034  (n.s.) |

Panel 1. Correlation between biochemical estimations for all groups. A: estimations before CR; B: estimations during CR; C: estimations on day 10 after BMT; D: estimations on day 20 after BMT. CR: conditioning regimen; BMT: bone marrow transplantation; TBARS: thiobarbituric acid-reactive substances; VIT C: vitamin C; CAT: catalase; SOD: superoxide dismutase; P-SH: protein thiol groups; NP-SH: non protein thiol groups; -ALA-D: -aminolevulinate dehydratase; n.s.: no significant.

*Significantly different.
